# Supplementary material for: Robust and stable transcriptional repression in Giardia using CRISPRi
Source: PubMed Central journal article supplement — Mol Biol Cell. 2019 Jan 1;30(1):119–30. doi: 10.1091/mbc.E18-09-0605 (PMC6337905; doi:10.1091/mbc.e18-09-0605), 2019-01-01
Supplement: mbc-30-119-s001.pdf [file mbc-30-119-s001.pdf]

# Supplemental Materials

*Molecular Biology of the Cell*

McInally et al.

| Target/Position    | Strand | Direction | Primer Sequence (5'→3')  | PAM |
|--------------------|--------|-----------|--------------------------|-----|
| Nanoluc_gRNA_(-11) | -1     | F         | caaaaccatgggaattttaatttt | cgg |
|                    |        | R         | aaacaaaattaaaattcccatggt |     |
| Nanoluc_gRNA_53    | -1     | F         | caaagacttggtccaggtttagc  | cgg |
|                    |        | R         | aaacgctacaacctggaccaagtc |     |
| Nanoluc_gRNA_95    | -1     | F         | caaaccgagattctgaacaaac   | tgg |
|                    |        | R         | aaacgtttgtttcagaatctcggg |     |
| Nanoluc_gRNA_147   | -1     | F         | caaatcagcccattttaccgctc  | agg |
|                    |        | R         | aaacgagcgggtgaaatgggctga |     |
| Nanoluc_gRNA_193   | -1     | F         | caaatcgccgctcagaccttata  | cgg |
|                    |        | R         | aaactatgaaggtctgagcggcga |     |
| Nanoluc_gRNA_255   | -1     | F         | caaataaagtgatgatcatccaca | ggg |
|                    |        | R         | aaactgtggatgatcatcacttta |     |
| Nanoluc_gRNA_285   | -1     | F         | caaattaccagtgtgccatagtgc | agg |
|                    |        | R         | aaacgcactatggcacactggtaa |     |
| Nanoluc_gRNA_365   | -1     | F         | caaagatcttttgcctgcaaca   | cgg |
|                    |        | R         | aaactgttcgacggcaaaaagatc |     |
| Nanoluc_gRNA_401   | -1     | F         | caaaaattttgttgcgttcaca   | ggg |
|                    |        | R         | aaactgtggaacggcaacaaaatt |     |
| Nanoluc_gRNA_444   | -1     | F         | caaaggaacagcagggagcgtcg  | ggg |
|                    |        | R         | aaaccgacggctcctgctgttcc  |     |
| Nanoluc_gRNA_488   | -1     | F         | caaagcgttcgacagccgaccagc | cgg |
|                    |        | R         | aaacgctggcggctgtgcaacgc  |     |
| 16945_gRNA_(-55)   | -1     | F         | caaatctatggcacaaaaccacca | agg |
|                    |        | R         | aaactggtggttttgtgccataga |     |
| 16945_gRNA_(-61)   | 1      | F         | caaaagacttgaaaggtaaacct  | tgg |
|                    |        | R         | aaacaggtttaccttccaagtct  |     |
| 16945_gRNA_24      | -1     | F         | caaagatttctgactcgagccac  | tgg |
|                    |        | R         | aaacgtggctcgagtcagcaaatc |     |
| 16945_gRNA_60      | -1     | F         | caaataccttgctgttcaaagca  | ggg |
|                    |        | R         | aaactgctttgaacagcaaggta  |     |
| 17333_gRNA_127     | -1     | F         | caaagctgacttctcctgctcagg | agg |
|                    |        | R         | aaaccctgagcaggagaagtcagc |     |
| 17333_gRNA_42      | -1     | F         | caaatctctcgggcgttgagaggc | cgg |
|                    |        | R         | aaacgcctctcaacgccgagaga  |     |
| 16343_gRNA_11      | -1     | F         | caaacttgctgaaaaccatagcct | cgg |
|                    |        | R         | aaacaggctatggttttcagcaag |     |
| 16343_gRNA_1566    | -1     | F         | caaacctcgagctcctgtccttg  | agg |
|                    |        | R         | aaaccaaggacaaggagctcgagg |     |
| 16343_gRNA_(-7)    | -1     | F         | caaactcggacatttttaatttag | agg |
|                    |        | R         | aaacctaataaaaaatgtccgag  |     |
